# Supplementary material
Source: ML conference proceedings conference paper supplement (https://proceedings.neurips.cc/paper_files/paper/2012/hash/bc7316929fe1545bf0b98d114ee3ecb8-Abstract.html)
Supplement: Supplementary file 1 [file bc7316929fe1545bf0b98d114ee3ecb8-Supplemental.zip]

---

# Supplementary Material to Confusion-Based Online Learning and a Passive-Aggressive Scheme

---

**Liva Ralaivola**

QARMA, Laboratoire d'Informatique Fondamentale de Marseille  
Aix-Marseille University, France  
liva.ralaivola@lif.univ-mrs.fr

## 1 Proof of COPA's update procedure

A bit of notation. Input space is  $\mathcal{X} \doteq \mathbb{R}^d$ ,  $W \doteq [w_1 \cdots w_Q]$ ;  $\mathbf{1} \doteq [1 \cdots 1]^\top$  of the appropriate dimension (always clear from context). Therefore,  $W\mathbf{1} = \sum_{q=1, \dots, Q} w_q$ .

### 1.1 Primal and Dual Problems

Ultimate goal: we want to solve the following problem, for  $p$  (and thus  $(x, y)$ ) fixed,

$$\min_{W, W\mathbf{1}=\mathbf{0}} F(W) \doteq \frac{1}{2} \sum_{q=1}^Q \|w_q - w_q^t\|^2 + \frac{C}{2} \sum_{q \neq p} |\langle w_q, x \rangle + \Delta|_+^2, \quad (1)$$

where  $\Delta > 0$  (it is  $\Delta = 1/(Q-1)$ ) in the main text). Thich can be equivalently written as

$$\min_{W, \xi} G(W, \xi) \doteq \frac{1}{2} \sum_{q=1}^Q \|w_q - w_q^t\|^2 + \frac{C}{2} \sum_{q \neq p} \xi_q^2 \quad (2)$$

$$\text{s.t. } \sum_{q=1}^Q w_q = \mathbf{0} \wedge \xi_q \geq \langle w_q, x \rangle + \Delta, \quad q \neq y. \quad (3)$$

Here, 'equivalently' means that a solution  $W^*$  of the former optimization problem is also a solution of the latter (and *vice versa*). The optimal slack variables  $\xi^*$  are then such that

$$\xi_q^* = |\langle w_q^*, x \rangle + \Delta|_+, \quad q \neq y.$$

To solve this optimization problem, we may introduce the Lagrangian of the previous problem:

$$L(W, \xi, \alpha) = G(W, \xi) - \sum_{q \neq y} \alpha_q [\xi_q - \langle w_q, x \rangle - \Delta] - \lambda^\top W\mathbf{1}, \quad (4)$$

where  $\lambda \in \mathbb{R}^d$  and  $\alpha_q \geq 0$ , for  $q \neq y$ .

Taking derivatives of  $L$  with respect to the primal variables  $W$  and  $\xi$  and making the gradient be zero (a necessary condition on  $L$  for the primal variables to be optimal) gives:

$$\nabla_{w_q} L = w_q - w_q^t + \alpha_q x - \lambda = 0, \quad q \neq y \quad (5)$$

$$\nabla_{w_y} L = w_y - w_y^t - \lambda = 0 \quad (6)$$

$$\nabla_{\xi_q} L = \alpha_q - C\xi_q \quad (7)$$

Or, stated otherwise,

$$w_q = w_q^t - \alpha_q x + \lambda, \quad q = 1, \dots, Q \quad (8)$$

$$\alpha_q = C\xi_q, \quad (9)$$

where we have introduced a Lagrangian multiplier  $\alpha_y$  that is *clamped* to 0 —this allows us to lighten the notation by not having to write  $q \neq y$  when referring to index  $q$ .

Note, otherwise, that the Karush-Kuhn-Tucker optimality conditions give that, for all  $q \neq y$

$$\alpha_q [\xi_q - \langle w_q, x \rangle - \Delta] = 0. \quad (10)$$

Summing the  $Q$  equations in (8), using the fact that  $\sum_q w_q^t = \mathbf{0}$  and that we require  $\sum_q w_q = \mathbf{0}$  for the new vectors that we are computing leads to:

$$\sum_q w_q = \sum_q w_q^t - \sum_q \alpha_q x - Q\lambda \Leftrightarrow \mathbf{0} = \mathbf{0} - \sum_q \alpha_q x + Q\lambda \quad (11)$$

$$\Leftrightarrow \lambda = \frac{s_\alpha}{Q} x, \quad (12)$$

where, we have introduced the notation  $s_\alpha$  for the sum of the  $\alpha_q$ 's:

$$s_\alpha \doteq \sum_{q=1}^Q \alpha_q = \boldsymbol{\alpha}^\top \mathbf{1}. \quad (13)$$

Henceforth the necessary condition (8) for  $W$  to be optimal rewrites as

$$w_q = w_q^t - \left( \alpha_q - \frac{s_\alpha}{Q} \right) x, \quad q = 1, \dots, Q \quad (14)$$

After some algebra, replacing  $W$  and  $\xi$  in the Lagrangian (4) thanks to Equations (9) and (14) allow us to get the dual objective  $H(\boldsymbol{\alpha})$  of (1):

$$H(\boldsymbol{\alpha}) \doteq -\frac{1}{2} \left( \|x\|^2 + \frac{1}{C} \right) \sum_{q=1}^Q \alpha_q^2 + \frac{1}{2} \frac{\|x\|^2}{Q} \left( \sum_{q=1}^Q \alpha_q \right)^2 + \sum_{q=1}^Q \alpha_q \ell_q^t \quad (15)$$

where, for the sake of readability, the following notation is introduced:

$$\ell_q^t \doteq \langle w_q^t, x \rangle + \Delta \quad (16)$$

$$\kappa \doteq \frac{1}{C} + \|x\|^2. \quad (17)$$

Given the convexity of optimization problems (1) and (2), the solution  $\boldsymbol{\alpha}^*$  of the convex optimization problem

$$\max_{\boldsymbol{\alpha}} H(\boldsymbol{\alpha}) \quad \text{s.t. } \alpha_y = 0 \wedge \alpha_q \geq 0, q \neq y \quad (18)$$

provides a solution  $W^*$  of (1) thanks to (14) through

$$w_q^* = w_q^t - \left( \alpha_q^* - \frac{1}{Q} \sum_{q=1}^Q \alpha_q^* \right) x, \quad q = 1, \dots, Q. \quad (19)$$

The following lemma shows that the dual objective  $H$  given by (15) is strictly concave in  $\boldsymbol{\alpha}$ : the dual optimization problem (18) therefore admits a unique maximum  $\boldsymbol{\alpha}^*$ , and it is thus valid to refer to  $\boldsymbol{\alpha}^*$  as *the* optimal solution of (18).

**Lemma 1.** *The dual objective  $H$  (15) is strictly concave and optimization problem (18) admits a unique maximizer  $\boldsymbol{\alpha}^*$ .*

*Proof.* It is sufficient to show that the Hessian of  $-H$  is strictly positive, i.e. that it only has positive eigenvalues. Rewriting things in matrix form, and leaving the linear part of  $-H$  aside, this means it is sufficient to show that the application

$$R : \boldsymbol{\alpha} \mapsto R(\boldsymbol{\alpha}) \doteq \boldsymbol{\alpha}^\top \left( \frac{1}{C} \mathbb{I} + \|x\|^2 \left( \mathbb{I} - \frac{1}{Q} \mathbf{1}\mathbf{1}^\top \right) \right) \boldsymbol{\alpha}$$

is strictly convex. Observing that

$$(\mathbb{I} - \mathbf{1}\mathbf{1}^\top/Q)^2 = (\mathbb{I} - \mathbf{1}\mathbf{1}^\top/Q)$$

tells you that  $(\mathbb{I} - \mathbf{1}\mathbf{1}^\top/Q)$  is a projection operator, and that its only eigenvalues are therefore 0 and 1 (see, e.g. [2]). Hence, since the only eigenvalue of  $\mathbb{I}/C$  is obviously  $1/C$ , the eigenvalues of the Hessian of  $R$  are  $1/C$  and  $1 + 1/C$ , and  $R$  is strictly convex.

This leads to the fact that  $-H$  (adding the linear —convex— term to  $R$ ) is strictly convex as well. The domain over which  $-H$  has to be minimized is made of nonnegative constraints only and is therefore convex: minimizing  $-H$  over the domain is therefore a (strict) convex optimization problem and it admits a *unique* solution,  $\alpha^*$ .  $\square$

## 1.2 Families $(\alpha(\mathcal{I}))_{\mathcal{I}}$ and $(W(\mathcal{I}))_{\mathcal{I}}$

We now show that finding  $\alpha^*$  (and therefore  $W^*$ ) might be done in constant time, without recouring to any optimization procedure. The idea of the proof is similar to what is encountered when performing projection on mixed-norm balls [], and more closely related to the work of [1].

In order to state the main theorem of this section, it is handy to introduce the family  $(\alpha(\mathcal{I}))_{\mathcal{I} \subseteq \mathcal{Y} \setminus \{y\}}$  of vectors defined as follows.

**Definition 1** (Family  $(\alpha(\mathcal{I}))_{\mathcal{I} \subseteq \mathcal{Y} \setminus \{y\}}$ ). The family  $(\alpha(\mathcal{I}))_{\mathcal{I} \subseteq \mathcal{Y} \setminus \{y\}}$  is such that the components  $\alpha_q(\mathcal{I})$  of  $\alpha(\mathcal{I})$  verify:

$$\alpha_q(\mathcal{I}) \doteq \begin{cases} \frac{1}{\kappa} \left( \ell_q^t + \frac{\|x\|^2}{Q} s_\alpha(\mathcal{I}) \right) & \text{if } q \in \mathcal{I} \\ 0 & \text{otherwise} \end{cases} \quad (20)$$

where,  $I \doteq |\mathcal{I}|$  being the size of  $\mathcal{I}$ ,

$$s_\alpha(\mathcal{I}) \doteq \frac{Q}{\kappa Q - I\|x\|^2} \sum_{q \in \mathcal{I}} \ell_q^t. \quad (21)$$

*Remark 1.* A few observations may be issued regarding  $\alpha(\mathcal{I})$ . First, the denominator appearing in (21) *cannot* be zero: it suffices to recall the definition of  $\kappa$  in (17) and the fact that  $I$  is strictly lower than  $Q$ . Then, with no additional constraint on  $\mathcal{I}$ , there is no reason for the  $\alpha_q(\mathcal{I})$ ,  $q \in \mathcal{I}$  not to be negative —as we shall see, we will later on build a set  $\mathcal{I}^*$  such that  $\alpha_q(\mathcal{I}^*) > 0$  whenever  $q \in \mathcal{I}^*$ . Finally, for  $p, q \in \mathcal{I}$ , if  $\ell_p^t \geq \ell_q^t$  then  $\alpha_p(\mathcal{I}) \geq \alpha_q(\mathcal{I})$  (this directly comes from (20)).

The family  $(\alpha(\mathcal{I}))_{\mathcal{I}}$  directly induces a family  $(W(\mathcal{I}))_{\mathcal{I}}$  as follows.

**Definition 2** (Family  $(W(\mathcal{I}))_{\mathcal{I} \subseteq \mathcal{Y} \setminus \{y\}}$ ). The family  $(W(\mathcal{I}) = [w_1(\mathcal{I}) \cdots w_Q(\mathcal{I})])_{\mathcal{I} \subseteq \mathcal{Y} \setminus \{y\}}$  is deduced from  $(\alpha(\mathcal{I}))_{\mathcal{I} \subseteq \mathcal{Y} \setminus \{y\}}$  as follows:

$$w_q(\mathcal{I}) \doteq w_q^t - \left( \alpha_q(\mathcal{I}) - \frac{1}{Q} s_\alpha(\mathcal{I}) \right) x, \quad q = 1, \dots, Q. \quad (22)$$

## 1.3 Efficient Updates

From now on, we assume we have at hand a permutation  $\sigma : \{1, \dots, Q-1\} \rightarrow \mathcal{Y} \setminus \{y\}$  such that

$$\ell_{\sigma(1)}^t \geq \dots \geq \ell_{\sigma(Q-1)}^t.$$

The main theorem of this section follows.

**Theorem 1.** Let  $I^*$  be the largest index  $I \in \{1, \dots, Q-1\}$  such that

$$\ell_{\sigma(I)}^t + \frac{\|x\|^2}{\kappa Q - (I-1)\|x\|^2} \sum_{q=1}^{I-1} \ell_{\sigma(q)}^t > 0. \quad (23)$$

If  $\mathcal{I}^*$  is set to  $\mathcal{I}^* \doteq \{\sigma(1), \dots, \sigma(I^*)\}$ , then  $\alpha^* \doteq \alpha(\mathcal{I}^*)$  is the solution of problem (18), and

$$w_q^* = w_q^t - \left( \alpha_q(\mathcal{I}^*) - \frac{1}{Q} \sum_{q=1}^{I^*} \alpha_q(\mathcal{I}^*) \right) x, \quad q = 1, \dots, Q \quad (24)$$

is the solution of problem (2), i.e. it provides us with the update equation to perform learning.

The proof of this theorem develops upon two ideas, that are established in Lemma 2 and Lemma 3. Lemma 2 establishes the analytic form of  $\alpha^*$ , by proving that it is an element of the family  $(\alpha(\mathcal{I}))_{\mathcal{I}}$  introduced before. The question raised by the latter lemma is therefore that of finding the correct  $\mathcal{I}^*$ . Lemma 3 explains why the set  $\mathcal{I}^*$  given in Theorem 1 is indeed an optimal set of indices.

**Lemma 2.** *The solution  $\alpha^*$  of Problem (18) is such that  $\alpha^* \in (\alpha(\mathcal{I}))_{\mathcal{I} \subseteq \mathcal{Y} \setminus \{y\}}$ , i.e. the components  $\alpha_q^*$  of  $\alpha^*$  obey (20) (see Definition 1).*

*Proof.* We denote by  $W^*$ ,  $w_q^*$ ,  $\xi^*$  the primal variable at the optimum of (2).

Suppose that we know the set  $\mathcal{I}^*$  of indices such that for  $q \in \mathcal{I}^*$ ,  $\alpha_q^* > 0$  and denote  $I^* = |\mathcal{I}^*|$  the size of  $\mathcal{I}^*$ . Given optimality condition (9), we have  $\xi_q^* = \alpha_q^*/C$ , for  $q \in \mathcal{I}^*$ . Combining the complementarity condition (10) and the expression of  $w_q^*$  given by (14), we get that, for  $q \in \mathcal{I}^*$ :

$$\begin{aligned} \frac{\alpha_q^*}{C} - \left\langle w_q^t - \left( \alpha_q^* - \frac{1}{Q} s_{\alpha^*} \right) x, x \right\rangle - \Delta &= 0 \Leftrightarrow \frac{\alpha_q^*}{C} - \ell_q^t + \left( \alpha_q^* - \frac{1}{Q} s_{\alpha^*} \right) \|x\|^2 = 0 \\ &\Leftrightarrow \kappa \alpha_q^* - \ell_q^t - \frac{\|x\|^2}{Q} s_{\alpha^*} = 0 \\ &\Leftrightarrow \alpha_q^* = \frac{1}{\kappa} \left( \ell_q^t + \frac{\|x\|^2}{Q} s_{\alpha^*} \right), \end{aligned}$$

where  $s_{\alpha^*} = \sum_{q \in \mathcal{I}^*} \alpha_q^*$ . Summing over  $q \in \mathcal{I}^*$  gives

$$s_{\alpha^*} = \frac{1}{\kappa} \left( \sum_{q \in \mathcal{I}^*} \ell_q^t + I^* \frac{\|x\|^2}{Q} s_{\alpha^*} \right) \Leftrightarrow s_{\alpha^*} = \frac{Q}{\kappa Q - I^* \|x\|^2} \sum_{q \in \mathcal{I}^*} \ell_q^t.$$

This completes the proof.  $\square$

**Lemma 3.** *If  $\mathcal{I}^*$  is chosen as recommended by Theorem 1 then  $\alpha(\mathcal{I}^*)$  is the solution of Problem (18).*

*Proof.* Let  $I^*$  be chosen as the largest  $I$  fulfilling (23) and  $\mathcal{I}^* \doteq \{\sigma(1), \dots, \sigma(I^*)\}$ .

On the one hand,

$$\begin{aligned} \ell_{\sigma(I^*)}^t + \frac{\|x\|^2}{\kappa Q - (I^* - 1)\|x\|^2} \sum_{q=1}^{I^*-1} \ell_{\sigma(q)}^t &> 0 \Leftrightarrow (\kappa Q - (I^* - 1)\|x\|^2) \ell_{\sigma(I^*)}^t + \|x\|^2 \sum_{q=1}^{I^*-1} \ell_{\sigma(q)}^t > 0 \\ &\Leftrightarrow (\kappa Q - (I^* - 1)\|x\|^2) \ell_{\sigma(I^*)}^t + \|x\|^2 \sum_{q=1}^{I^*} \ell_{\sigma(q)}^t - \|x\|^2 \ell_{\sigma(I^*)}^t > 0 \\ &\Leftrightarrow (\kappa Q - I^* \|x\|^2) \ell_{\sigma(I^*)}^t + \|x\|^2 \sum_{q=1}^{I^*} \ell_{\sigma(q)}^t > 0 \\ &\Leftrightarrow \ell_{\sigma(I^*)}^t + \frac{\|x\|^2}{Q} \frac{Q}{\kappa Q - I^* \|x\|^2} \sum_{q \in \mathcal{I}^*} \ell_q^t > 0 \\ &\Leftrightarrow \ell_{\sigma(I^*)}^t + \frac{\|x\|^2}{Q} s_{\alpha}(\mathcal{I}^*) > 0 \Leftrightarrow \alpha_{\sigma(I^*)} > 0 \end{aligned}$$

where we used that the denominators are strictly positive in the first and next-to-last lines, and that  $\sum_{q=1}^{I^*} \ell_{\sigma(q)}^t = \sum_{q \in \mathcal{I}^*} \ell_q^t$ , by the definition of  $\mathcal{I}^*$ . Using  $\alpha_p(\mathcal{I}) \geq \alpha_q(\mathcal{I})$  for any  $\mathcal{I}$ , whenever  $\ell_p^t \geq \ell_q^t$  for  $p, q \in \mathcal{I}$  (see Remark 1), this first series of equations says that

$$\alpha_q(\mathcal{I}^*) > 0, \quad q \in \mathcal{I}^*. \quad (25)$$

On the other hand, we have

$$\ell_{\sigma(J)}^t + \frac{\|x\|^2}{Q} s_{\alpha}(\mathcal{I}^*) \leq 0, \quad \forall J > I^*. \quad (26)$$

Indeed, it suffices to observe that, using the definition of  $s_\alpha(\mathcal{I}^*)$  (see (21))

$$\ell_{\sigma(I^*+1)}^t + \frac{\|x\|^2}{Q} s_\alpha(\mathcal{I}^*) > 0 \Leftrightarrow \ell_{\sigma(I^*+1)}^t + \frac{\|x\|^2}{\kappa Q - I^* \|x\|^2} \sum_{q=1}^{I^*} \ell_{\sigma(q)}^t > 0,$$

which is impossible because it would mean that  $I^* + 1$  also fulfills equation (23) while being larger than  $I^*$ . Hence

$$\ell_{\sigma(I^*+1)}^t + \frac{\|x\|^2}{Q} s_\alpha(\mathcal{I}^*) \leq 0.$$

As for all  $J \geq I^* + 1$ ,  $\ell_{\sigma(J)^*}^t \leq \ell_{\sigma(I^*+1)}^t$ , Equation (26) indeed holds.

We are now ready to prove that  $\alpha(\mathcal{I}^*)$  is the optimal solution of (18). To do so, we are simply going to show that the duality gap between the primal and dual objective is zero when considering  $W(\mathcal{I}^*)$  and  $\alpha(\mathcal{I}^*)$ , i.e.

$$F(W(\mathcal{I}^*)) - H(\alpha(\mathcal{I}^*)) = 0.$$

As the primal optimization problem is convex, having a zero duality gap is a necessary and sufficient condition for  $\alpha(\mathcal{I}^*)$  (and thus,  $W(\mathcal{I}^*)$ ) to be the solution of (18).

A few calculations give the following:

$$\begin{aligned} F(W(\mathcal{I}^*)) &= \frac{1}{2} \kappa \sum_{q=1}^{I^*} \alpha_q^2(\mathcal{I}^*) - \frac{1}{2} \frac{\|x\|^2}{Q} s_\alpha(\mathcal{I}^*) + \frac{C}{2} \sum_{q=I^*+1}^Q \left| \ell_{\sigma(q)}^t + \frac{\|x\|^2}{Q} s_\alpha(\mathcal{I}^*) \right|_+^2 \\ H(\alpha(\mathcal{I}^*)) &= \frac{1}{2} \kappa \sum_{q=1}^{I^*} \alpha_q^2(\mathcal{I}^*) - \frac{1}{2} \frac{\|x\|^2}{Q} s_\alpha(\mathcal{I}^*), \end{aligned}$$

and the duality gap is therefore given by

$$F(W(\mathcal{I}^*)) - H(\alpha(\mathcal{I}^*)) = \frac{C}{2} \sum_{q=I^*+1}^Q \left| \ell_{\sigma(q)}^t + \frac{\|x\|^2}{Q} s_\alpha(\mathcal{I}^*) \right|_+^2,$$

and, as established in (26),  $\ell_{\sigma(q)}^t + \frac{\|x\|^2}{Q} s_\alpha(\mathcal{I}^*) \leq 0$  for  $q > I^*$ . We thus have the desired result:  $F(W(\mathcal{I}^*)) - H(\alpha(\mathcal{I}^*)) = 0$ .

All in all, we have constructed a vector of coefficients  $\alpha^\mathcal{I}$  fulfilling the nonnegativity constraints and realizing a zero-duality gap:  $\alpha(\mathcal{I})$  is indeed the solution of Problem (18). Consequently,  $W(\mathcal{I}^*)$  is the solution of Problem (2).  $\square$

## References

- [1] S. Matsushima, N. Shimizu, K. Yoshida, T. Ninomiya, and H. Nakagawa. Exact passive-aggressive algorithm for multiclass classification using support class. In *SDM 10*, pages 303–314, 2010.
- [2] C. D. Meyer. *Matrix Analysis and Applied Linear Algebra*. SIAM, 2001.
