# Supplementary material
Source: ML conference proceedings conference paper supplement (https://proceedings.neurips.cc/paper_files/paper/2012/hash/bc7316929fe1545bf0b98d114ee3ecb8-Abstract.html)
Supplement: Supplementary file 2 [file bc7316929fe1545bf0b98d114ee3ecb8-Supplemental.zip]

Archive with 1 entries (1 files):
- onlineconfusion_supplementary.pdf
